# Supplementary material for: Assessment of Body Composition in Athletes: A Narrative Review of Available Methods with Special Reference to Quantitative and Qualitative Bioimpedance Analysis
Source: MDPI journal article supplement (doi:10.3390/nu13051620), 2021-05-12
Supplement: s1 [file s1]

Table S1. Complete Search Strategy.

|                                                                                                                                                                                                                                                                                                                                                                                                                                                                                                                                                                                                                                                                           |
|---------------------------------------------------------------------------------------------------------------------------------------------------------------------------------------------------------------------------------------------------------------------------------------------------------------------------------------------------------------------------------------------------------------------------------------------------------------------------------------------------------------------------------------------------------------------------------------------------------------------------------------------------------------------------|
| <p>Title of the database searched<br/><b>PubMed</b></p> <p>Name of the database platform<br/><b>National Center for Biotechnology Information</b></p> <p>Complete search strategy<br/>("Athletes"[Mesh] OR "Sports"[Mesh]) OR ("athlete*"[Title/Abstract] OR "player*"[Title/Abstract] AND ("bioimpedance analysis"[Mesh] OR "BIA*"[Title/Abstract] OR "BIVA*"[Title/Abstract] OR "bioelectrical proprieties*"[Title/Abstract] OR "phase angle*"[Title/Abstract] OR "impedance*"[Title/Abstract] AND ("humans"[MeSH Terms] AND English[lang])</p>                                                                                                                         |
| <p>Title of the database searched<br/><b>SPORTDiscus</b></p> <p>Name of the database platform<br/><b>EBSCOhost</b></p> <p>Complete search strategy<br/>( ( KW ( athletes OR sports ) OR SU ( athletes OR sports ) OR TI ( athlete* OR player* ) OR AB ( athlete* OR player* ) AND ( KW ( bioimpedance analysis OR BIA* ) OR SU (bioimpedance analysis) OR TI ( "bioimpedance*" OR "BIA*" OR "BIVA*" OR "impedance*" OR "phase angle*" OR "bioelectrical proprieties" OR "resistance" OR "reactance") OR AB ("bioimpedance*" OR "BIA*" OR "BIVA*" OR "impedance*" OR "phase angle*" OR "bioelectrical proprieties" OR "resistance" OR "reactance")) ) ) AND LA english</p> |
| <p>Title of the database searched<br/><b>MEDLINE</b></p> <p>Name of the database platform<br/><b>Ovid</b></p> <p>Complete search strategy<br/>(Bioimpedance analysis.sh. or (BIA* or impedance).ti. or (bioimpedance analysis* BIA* or impedance* or bioelectrical proprieties or phase angle or BIVA or bioimpedance vector analysis).ab.) and ((Athletes or Sports).sh. or (athlete* or player* or train* or sport).ab. or (athlete* or player* or train* or sport).ti.) and limit 1 to (english language and humans)</p>                                                                                                                                               |
| <p>Title of the database searched<br/><b>Embase</b></p> <p>Name of the database platform<br/><b>Ovid</b></p> <p>Complete search strategy<br/>(Bioimpedance Analysis.sh. or (bioimpedance analysis* or bioimpedance* or BIA* or phase angle or bioelectrical proprieties or BIVA or bioimpedance vector analysis).ti. or (bioimpedance analysis* or BIA* or phase angle or bioelectrical proprieties or BIVA or bioimpedance vector analysis).ab.) and ((Athletes or Sports).sh. or (athlete* or player* or train* or sport).ab. or (athlete* or player* or competit* or train* or sport).ti.) and limit 1 to (english language and humans)</p>                            |
| <p>Title of the database searched<br/><b>Emcare</b></p> <p>Name of the database platform<br/><b>Ovid</b></p> <p>Complete search strategy</p>                                                                                                                                                                                                                                                                                                                                                                                                                                                                                                                              |

|                                                                                                                                                                                                                                                                                                                                                                                                                                                                                                         |
|---------------------------------------------------------------------------------------------------------------------------------------------------------------------------------------------------------------------------------------------------------------------------------------------------------------------------------------------------------------------------------------------------------------------------------------------------------------------------------------------------------|
| <p>((Bioimpedance Analysis.sh. or (bioimpedance analysis* or BIA* or phase angle or bioelectrical proprieties or BIVA or bioimpedance vector analysis).ti. or (bioimpedance analysis* or BIA* or bioelectrical proprieties or phase angle or BIVA or bioimpedance vector analysis).ab.) and ((Athletes or Sports).sh. or (athlete* or player* or competit* or or train* or sport).ab. or (athlete* or player* or competit* or or train* or sport).ti.) and limit 1 to (english language and humans)</p> |
| <p>Title of the database searched<br/> <b>Scopus</b><br/> Name of the database platform<br/> <b>Elsevier Science Publishers</b><br/> Complete search strategy<br/> <b>TITLE-ABS-KEY (( ( "bioimpedance analysis*" OR "BIA *" OR "BIVA" OR "phase angle" OR "bioelectrical proprieties*" OR "bioimpedance vector analysis" ) AND ( "athlete*" OR "player*" OR "competit*" OR "train*" OR "sport" ) ) ) AND "human*" AND ( LIMIT TO ( LANGUAGE , "English" ) )</b></p>                                    |
| <p>Title of the database searched<br/> <b>The Cochrane Library</b><br/> Name of the database platform<br/> <b>John Wiley and Sons</b><br/> Complete search strategy<br/> <b>(( ( "bioimpedance analysis*" OR "BIA*" OR "BIVA" OR "bioimpedance vector analysis" OR "phase angle" ) AND ( "athlete*" OR "player*" OR "competit*" OR "train*" OR "sport*" ) ) ) in Title Abstract Keyword - (Word variations have been searched)</b></p>                                                                  |
| <p>Title of the database searched<br/> <b>Web of Science</b><br/> Name of the database platform<br/> <b>Clarivate Analytics</b><br/> Complete search strategy<br/> <b>(TS = ((( "bioimpedance analysis*" OR "BIA*" OR "BIVA" OR "bioimpedance vector analysis" OR "phase angle OR "bioelectrical proprieties") AND ("athlete*" OR "player*" OR "competit*" OR "train*" OR "sport*" ) ))) AND LANGUAGE: (English)</b></p>                                                                                |
| <p>Title of the database searched<br/> <b>AUSPORT</b><br/> Name of the database platform<br/> <b>Informit</b><br/> Complete search strategy<br/> <b>All Fields, Any Term ("bioimpedance analysis*" OR "BIA*" OR "BIVA" OR "bioimpedance vector analysis" OR "phase angle OR "bioelectrical proprieties") AND ( "athlete*" OR "player*" OR "competit*" OR "train*" OR "sport*" )</b></p>                                                                                                                 |
| <p>Title of the database searched<br/> <b>CINAHL</b><br/> Name of the database platform<br/> <b>EBSCOhost</b><br/> Complete search strategy<br/> <b>( ( KW ( athletes OR sports ) OR SU ( athletes OR sports ) OR TI ( athlete* OR player* OR competit* OR train* OR sport* ) OR AB ( athlete* OR player* OR competit* OR train* OR sport* ) ) AND (</b></p>                                                                                                                                            |

KW ( bioimpedance analysis OR BIA\* ) OR SU ( bioimpedance analysis) OR TI ( "bioimpedance analysis\*" OR "BIA \*" OR "BIVA OR "bioimpedance vector analysis" OR "phase angle" OR "bioelectrical proprieties") OR AB ( "bioimpedance analysis\*" OR "BIA\*" OR "BIVA" OR "bioimpedance vector analysis" OR "phase angle" OR "bioelectrical proprieties" ) ) AND LA english AND DH Human
